# Supplementary material for: Outcomes Among Undocumented Immigrant Kidney Transplant Recipients in California
Source: PubMed Central journal article supplement (PMC9926318; doi:10.1001/jamanetworkopen.2022.54660), 2023-02-13

## Supplemental Online Content

Eguchi N, Tantisattamo E, Chung D, et al. Outcomes among undocumented immigrant kidney transplant recipients in California. *JAMA Netw Open*. 2023;6(2):e2254660. doi:10.1001/jamanetworkopen.2022.54660

**eTable 1.** All-Cause Graft Loss for All Transplant (LDRT and DDRT)

**eTable 2.** All-Cause Graft Loss for DDRT Only

**eTable 3.** Dialysis After Graft Loss (DAGL) for All Transplant

**eTable 4.** DAGL for DDRT Only

**eTable 5.** All-Cause Mortality for All Transplants

**eTable 6.** All-Cause Mortality for DDRT Only

**eTable 7.** Rejection for All Transplant

**eTable 8.** Rejection for DDRT Only

**eFigure 1.** Cumulative Incidence Curve for A) Death Censored Graft Loss B) Death and Graft Loss Censored Rejection by Residency Status

**eFigure 2.** Conceptual Framework

This supplemental material has been provided by the authors to give readers additional information about their work.

eTable 1. All-Cause Graft Loss for All Transplant (LDRT and DDRT)

|            |                                   | Hazards ratio (US resident vs. Undocumented Immigrants) |             |      |
|------------|-----------------------------------|---------------------------------------------------------|-------------|------|
| Unadjusted | Unadjusted                        | HR*                                                     | 95% CI      | P    |
|            |                                   | 2.92                                                    | [1.25,6.85] | 0.01 |
| Adjusted   | Adjusted variables                | HR*                                                     | 95% CI      | P    |
|            | <b>Demographics</b>               |                                                         |             |      |
|            | <i>Age</i>                        | 2.45                                                    | [1.02,5.9]  | 0.04 |
|            | <i>Race (AA)</i>                  | 2.6                                                     | [1.1,6.15]  | 0.03 |
|            | <i>Ethnicity</i>                  | 2.7                                                     | [1.11,6.53] | 0.03 |
|            | <i>Obesity</i>                    | 2.79                                                    | [1.19,6.55] | 0.02 |
|            | <b>Comorbidities</b>              |                                                         |             |      |
|            | <i>CAD</i>                        | 2.98                                                    | [1.27,7.00] | 0.01 |
|            | <i>DM</i>                         | 2.74                                                    | [1.16,6.48] | 0.02 |
|            | <i>HTN</i>                        | 2.89                                                    | [1.23,6.77] | 0.01 |
|            | <i>Stroke</i>                     | 2.83                                                    | [1.2,6.65]  | 0.02 |
|            | <i>HF</i>                         | 2.93                                                    | [0.01,0.88] | 0.01 |
|            | <i>Cancer</i>                     | 2.83                                                    | [1.2,6.65]  | 0.02 |
|            | <b>Transplant Characteristics</b> |                                                         |             |      |
|            | <i>CIT (/5 hour)</i>              | 3.04                                                    | [1.3,7.11]  | 0.01 |
|            | <i>CMV High risk</i>              | 2.85                                                    | [1.21,6.69] | 0.02 |
|            | <i>Dialysis duration</i>          | 2.92                                                    | [1.25,6.85] | 0.01 |
|            | <i>DGF</i>                        | 2.52                                                    | [1.07,5.92] | 0.03 |
|            | <i>High PRA</i>                   | 2.95                                                    | [1.26,6.91] | 0.01 |
|            | <i>HLA</i>                        | 2.87                                                    | [1.22,6.73] | 0.02 |
|            | <i>Living Donor</i>               | 2.99                                                    | [1.28,7.00] | 0.01 |
|            | <i>Simulect Induction</i>         | 2.98                                                    | [1.27,7.00] | 0.01 |
|            | <i>OMM</i>                        | 2.9                                                     | [1.23,6.83] | 0.01 |
|            | <b>Donor Characteristics</b>      |                                                         |             |      |
|            | <i>Age</i>                        | 2.87                                                    | [1.23,6.74] | 0.02 |
|            | <i>Dm</i>                         | 3.01                                                    | [1.28,7.08] | 0.01 |
|            | <i>Ethnicity</i>                  | 2.95                                                    | [1.25,6.97] | 0.01 |
|            | <i>Gender</i>                     | 2.94                                                    | [1.25,6.90] | 0.01 |
| <i>HTN</i> | 3.17                              | [1.35,7.46]                                             | 0.01        |      |

|  |                 |      |             |      |
|--|-----------------|------|-------------|------|
|  | <i>Serum Cr</i> | 2.93 | [1.25,6.88] | 0.01 |
|--|-----------------|------|-------------|------|

OMM, 0-human leukocyte antigen mismatch; AA, African American; CAD, coronary artery disease; CI, Confidence interval; CIT, cold ischemic time; CMV, cytomegalovirus; Cr, creatinine; DDKT, deceased donor kidney transplant; DGF, delayed graft function; DM, diabetes mellitus; HF, heart failure; HLA, human leukocyte antigen; HR, hazard ratio; HTN, hypertension; LDKT, living donor kidney transplant; PRA, panel reactive antibody; UI, undocumented immigrants; UR, US residents

\* UI is a reference

eTable 2. All-Cause Graft Loss for DDRT Only

|            |                                   | Hazards ratio (US resident vs. Undocumented Immigrants) |             |      |
|------------|-----------------------------------|---------------------------------------------------------|-------------|------|
| Unadjusted | Unadjusted                        | HR*                                                     | 95% CI      | P    |
|            |                                   | 2.84                                                    | [1.11,7.22] | 0.02 |
| Adjusted   | Adjusted variables                | HR*                                                     | 95% CI      | P    |
|            | <b>Demographics</b>               |                                                         |             |      |
|            | <i>Age</i>                        | 2.53                                                    | [0.97,6.59] | 0.06 |
|            | <i>Race (AA)</i>                  | 2.94                                                    | [0.95-9.07] | 0.06 |
|            | <i>Ethnicity</i>                  | 2.23                                                    | [0.84,5.93] | 0.11 |
|            | <i>Obesity</i>                    | 2.83                                                    | [1.11,7.21] | 0.03 |
|            | <b>Comorbidities</b>              |                                                         |             |      |
|            | <i>CAD</i>                        | 3.13                                                    | [1.22,8.00] | 0.02 |
|            | <i>DM</i>                         | 2.71                                                    | [1.05,6.96] | 0.04 |
|            | <i>HTN</i>                        | 2.82                                                    | [1.11,7.19] | 0.03 |
|            | <i>Stroke</i>                     | 2.75                                                    | [1.08,7.02] | 0.03 |
|            | <i>HF</i>                         | 2.83                                                    | [1.11,7.22] | 0.03 |
|            | <i>Cancer</i>                     | 2.75                                                    | [1.08,7.03] | 0.03 |
|            | <b>Transplant Characteristics</b> |                                                         |             |      |
|            | <i>CIT (/5 hour)</i>              | 2.9                                                     | [1.14,7.4]  | 0.03 |
|            | <i>CMV High risk</i>              | 2.74                                                    | [1.07,7.02] | 0.04 |
|            | <i>DCD</i>                        | 2.75                                                    | [1.07,7.04] | 0.03 |
|            | <i>Dialysis duration</i>          | 2.88                                                    | [1.13,7.33] | 0.03 |
|            | <i>DGF</i>                        | 2.28                                                    | [0.89,5.85] | 0.09 |
|            | <i>High PRA</i>                   | 2.85                                                    | [1.12,7.25] | 0.03 |
|            | <i>HLA</i>                        | 2.74                                                    | [1.07,6.99] | 0.04 |
|            | <i>Simulect Induction</i>         | 2.81                                                    | [1.1,7.16]  | 0.03 |
|            | <i>OMM</i>                        | 2.73                                                    | [1.06,6.99] | 0.04 |
|            | <b>Donor Characteristics</b>      |                                                         |             |      |
|            | <i>Age</i>                        | 2.79                                                    | [1.09,7.1]  | 0.02 |
|            | <i>Dm</i>                         | 2.87                                                    | [1.12,7.34] | 0.03 |
|            | <i>Ethnicity</i>                  | 2.79                                                    | [1.1,7.1]   | 0.03 |
|            | <i>Gender</i>                     | 2.83                                                    | [1.11,7.21] | 0.03 |
|            | <i>HTN</i>                        | 3.05                                                    | [1.19,7.82] | 0.02 |

|  |                 |      |             |      |
|--|-----------------|------|-------------|------|
|  | <i>Serum Cr</i> | 2.89 | [1.13,7.37] | 0.03 |
|--|-----------------|------|-------------|------|

OMM, 0-human leukocyte antigen mismatch; AA, African American; CAD, coronary artery disease; CI, Confidence interval; CIT, cold ischemic time; CMV, cytomegalovirus; Cr, creatinine; DDKT, deceased donor kidney transplant; DGF, delayed graft function; DM, diabetes mellitus; HF, heart failure; HLA, human leukocyte antigen; HR, hazard ratio; HTN, hypertension; LDKT, living donor kidney transplant; PRA, panel reactive antibody; UI, undocumented immigrants; UR, US residents

\* UI is a reference

eTable 3. Dialysis After Graft Loss (DAGL) for All Transplant

|            |                                   | Hazards ratio (US resident vs. Undocumented Immigrants) |             |      |
|------------|-----------------------------------|---------------------------------------------------------|-------------|------|
| Unadjusted | Unadjusted                        | HR*                                                     | 95% CI      | P    |
|            |                                   | 2.27                                                    | [0.78,6.56] | 0.13 |
| Adjusted   | Adjusted variables                | HR*                                                     | 95% CI      | P    |
|            | <b>Demographics</b>               |                                                         |             |      |
|            | <i>Age</i>                        | 2.52                                                    | [0.84,7.5]  | 0.10 |
|            | <i>Race (AA)</i>                  | 2.94                                                    | [0.95,9.07] | 0.06 |
|            | <i>Ethnicity</i>                  | 2.52                                                    | [0.84,7.53] | 0.10 |
|            | <i>Obesity</i>                    | 2.16                                                    | [0.75,6.26] | 0.16 |
|            | <b>Comorbidities</b>              |                                                         |             |      |
|            | <i>CAD</i>                        | 2.31                                                    | [0.80,6.7]  | 0.12 |
|            | <i>DM</i>                         | 2.24                                                    | [0.76,6.56] | 0.14 |
|            | <i>HTN</i>                        | 2.250                                                   | [0.78,6.53] | 0.13 |
|            | <i>Stroke</i>                     | 2.33                                                    | [0.80,6.77] | 0.12 |
|            | <i>HF</i>                         | 2.22                                                    | [0.77,6.45] | 0.14 |
|            | <i>Cancer</i>                     | 2.1                                                     | [0.72,6.14] | 0.17 |
|            | <b>Transplant Characteristics</b> |                                                         |             |      |
|            | <i>CIT (/5 hour)</i>              | 2.32                                                    | [0.80,6.71] | 0.12 |
|            | <i>CMV High risk</i>              | 2.23                                                    | [0.77,6.48] | 0.14 |
|            | <i>Dialysis duration</i>          | 2.27                                                    | [0.78,6.56] | 0.13 |
|            | <i>DGF</i>                        | 1.78                                                    | [0.61,5.23] | 0.29 |
|            | <i>High PRA</i>                   | 2.27                                                    | [0.78,6.58] | 0.13 |
|            | <i>HLA</i>                        | 2.23                                                    | [0.77,6.49] | 0.14 |
|            | <i>Living Donor</i>               | 2.28                                                    | [0.79,6.58] | 0.13 |
|            | <i>Simulect Induction</i>         | 2.37                                                    | [0.82,6.87] | 0.11 |
|            | <i>OMM</i>                        | 2.22                                                    | [0.76,6.49] | 0.14 |
|            | <b>Donor Characteristics</b>      |                                                         |             |      |
|            | <i>Age</i>                        | 2.29                                                    | [0.79,6.64] | 0.13 |
|            | <i>Dm</i>                         | 2.37                                                    | [0.8,6.77]  | 0.12 |
|            | <i>Ethnicity</i>                  | 2.17                                                    | [0.74,6.41] | 0.16 |

|  |                 |      |             |      |
|--|-----------------|------|-------------|------|
|  | <i>Gender</i>   | 2.13 | [0.73,6.2]  | 0.17 |
|  | <i>HTN</i>      | 2.40 | [0.83,6.99] | 0.11 |
|  | <i>Serum Cr</i> | 2.35 | [0.81,6.8]  | 0.12 |

OMM, 0-human leukocyte antigen mismatch; AA, African American; CAD, coronary artery disease; CI, Confidence interval; CIT, cold ischemic time; CMV, cytomegalovirus; Cr, creatinine; DDKT, deceased donor kidney transplant; DGF, delayed graft function; DM, diabetes mellitus; HF, heart failure; HLA, human leukocyte antigen; HR, hazard ratio; HTN, hypertension; LDKT, living donor kidney transplant; PRA, panel reactive antibody; UI, undocumented immigrants; UR, US residents  
 \* UI is a reference

eTable 4. DAGL for DDRT Only

|            |                                   | Hazards ratio (US resident vs. Undocumented Immigrants) |             |      |
|------------|-----------------------------------|---------------------------------------------------------|-------------|------|
| Unadjusted | Unadjusted                        | HR*                                                     | 95% CI      | P    |
|            |                                   | 2.13                                                    | [0.62,7.29] | 0.23 |
| Adjusted   | Adjusted variables                | HR*                                                     | 95% CI      | P    |
|            | <b>Demographics</b>               |                                                         |             |      |
|            | <i>Age</i>                        | 2.33                                                    | [0.67,8.16] | 0.19 |
|            | <i>Race (AA)</i>                  | 2.23                                                    | [0.62,8.12] | 0.22 |
|            | <i>Ethnicity</i>                  | 2.06                                                    | [0.58,7.34] | 0.27 |
|            | <i>Obesity</i>                    | 2.16                                                    | [0.63,7.40] | 0.22 |
|            | <b>Comorbidities</b>              |                                                         |             |      |
|            | <i>CAD</i>                        | 2.4                                                     | [0.7,8.27]  | 0.17 |
|            | <i>DM</i>                         | 2.11                                                    | [0.61,7.34] | 0.34 |
|            | <i>HTN</i>                        | 2.14                                                    | [0.62,7.3]  | 0.23 |
|            | <i>HF</i>                         | 2.09                                                    | [0.61,7.17] | 0.24 |
|            | <i>Cancer</i>                     | 1.99                                                    | [0.58,6.87] | 0.28 |
|            | <b>Transplant Characteristics</b> |                                                         |             |      |
|            | CIT (/5 hour)                     | 2.28                                                    | [0.67,7.84] | 0.19 |
|            | CMV High risk                     | 2.08                                                    | [0.6,7.15]  | 0.25 |
|            | DCD                               | 1.85                                                    | [0.53,6.44] | 0.33 |
|            | Dialysis duration                 | 2.17                                                    | [0.63,7.41] | 0.22 |
|            | DGF                               | 1.47                                                    | [0.42,5.14] | 0.55 |
|            | High PRA                          | 2.18                                                    | [0.64,7.45] | 0.21 |
|            | HLA                               | 2.13                                                    | [0.62,7.32] | 0.23 |
|            | Simulect Induction                | 2.09                                                    | [0.61,7.15] | 0.24 |
|            | <i>OMM</i>                        | 3.98                                                    | [0.93,17]   | 0.05 |
|            | <b>Donor Characteristics</b>      |                                                         |             |      |
|            | <i>Age</i>                        | 2.17                                                    | [0.63,7.42] | 0.22 |
|            | <i>Dm</i>                         | 2.13                                                    | [0.62,7.32] | 0.23 |
|            | <i>Ethnicity</i>                  | 2.04                                                    | [0.60,6.98] | 0.26 |
|            | <i>Gender</i>                     | 2.09                                                    | [0.61,7.16] | 0.24 |
|            | <i>HTN</i>                        | 2.30                                                    | [0.66,7.94] | 0.19 |
|            | <i>Serum Cr</i>                   | 2.24                                                    | [0.66,7.69] | 0.20 |



|  |  |  |  |  |
|--|--|--|--|--|
|  |  |  |  |  |
|--|--|--|--|--|

OMM, 0-human leukocyte antigen mismatch; AA, African American; CAD, coronary artery disease; CI, Confidence interval; CIT, cold ischemic time; CMV, cytomegalovirus; Cr, creatinine; DDKT, deceased donor kidney transplant; DGF, delayed graft function; DM, diabetes mellitus; HF, heart failure; HLA, human leukocyte antigen; HR, hazard ratio; HTN, hypertension; LDKT, living donor kidney transplant; PRA, panel reactive antibody; UI, undocumented immigrants; UR, US residents

\* UI is a reference

eTable 5. All-Cause Mortality for All Transplants

|            |                                   | Hazards ratio (US resident vs. Undocumented Immigrants) |              |        |
|------------|-----------------------------------|---------------------------------------------------------|--------------|--------|
| Unadjusted | Unadjusted                        | HR*                                                     | 95% CI       | P      |
|            |                                   | 4.43                                                    | [1.05,18.69] | 0.0424 |
| Adjusted   | Adjusted variables                | HR*                                                     | 95% CI       | P      |
|            | <b>Demographics</b>               |                                                         |              |        |
|            | <i>Age</i>                        | 2.57                                                    | [0.59,11.23] | 0.21   |
|            | <i>Race (AA)</i>                  | 3.62                                                    | [0.28,0.83]  | 0.087  |
|            | <i>Ethnicity</i>                  | 3.28                                                    | [0.74,14.54] | 0.12   |
|            | <i>Obesity</i>                    | 4.28                                                    | [0.73,1.98]  | 0.048  |
|            | <b>Comorbidities</b>              |                                                         |              |        |
|            | <i>CAD</i>                        | 4.51                                                    | [1.07,19.03] | 0.04   |
|            | <i>DM</i>                         | 3.87                                                    | [0.91,16.43] | 0.07   |
|            | <i>HTN</i>                        | 4.28                                                    | [1.02,18.07] | <0.05  |
|            | <i>Stroke</i>                     | 4.11                                                    | [0.97,17.39] | 0.06   |
|            | <i>HF</i>                         | 4.44                                                    | [1.05,18.71] | 0.04   |
|            | <i>Cancer</i>                     | 4.33                                                    | [1.02,18.28] | <0.05  |
|            | <b>Transplant Characteristics</b> |                                                         |              |        |
|            | <i>CIT (/5 hour)</i>              | 4.73                                                    | [1.12, 20]   | 0.03   |
|            | <i>CMV High risk</i>              | 4.21                                                    | [1, 17.83]   | 0.05   |
|            | <i>Dialysis duration</i>          | 4.43                                                    | [1.05,18.69] | 0.04   |
|            | <i>DGF</i>                        | 4.10                                                    | [0.97,17.32] | 0.06   |
|            | <i>High PRA</i>                   | 4.46                                                    | [1.06,18.79] | 0.04   |
|            | <i>HLA</i>                        | 4.30                                                    | [1.02,18.16] | <0.05  |
|            | <i>Living Donor</i>               | 4.75                                                    | [1.13,20.04] | 0.03   |
|            | <i>Simulect Induction</i>         | 4.42                                                    | [1.05,18.66] | 0.04   |
|            | <i>OMM</i>                        | 4.41                                                    | [1.04,18.69] | 0.04   |
|            | <b>Donor Characteristics</b>      |                                                         |              |        |
|            | <i>Age</i>                        | 4.27                                                    | [1.01,18.03] | <0.05  |
|            | <i>Dm</i>                         | 4.65                                                    | [1.09,19.75] | 0.04   |
|            | <i>Ethnicity</i>                  | 4.63                                                    | [1.09,19.61] | 0.04   |
|            | <i>Gender</i>                     | 4.66                                                    | [1.11,19.67] | 0.04   |
|            | <i>HTN</i>                        | 4.99                                                    | [1.17,21.26] | 0.03   |

|  |                 |      |              |      |
|--|-----------------|------|--------------|------|
|  | <i>Serum Cr</i> | 4.41 | [1.05,18.57] | 0.04 |
|--|-----------------|------|--------------|------|

OMM, 0-human leukocyte antigen mismatch; AA, African American; CAD, coronary artery disease; CI, Confidence interval; CIT, cold ischemic time; CMV, cytomegalovirus; Cr, creatinine; DDKT, deceased donor kidney transplant; DGF, delayed graft function; DM, diabetes mellitus; HF, heart failure; HLA, human leukocyte antigen; HR, hazard ratio; HTN, hypertension; LDKT, living donor kidney transplant; PRA, panel reactive antibody; UI, undocumented immigrants; UR, US residents

\* UI is a reference

eTable 6. All-Cause Mortality for DDRT Only

|            | Hazards ratio (US resident vs. Undocumented Immigrants) |      |               |       |
|------------|---------------------------------------------------------|------|---------------|-------|
| Unadjusted | Unadjusted                                              | HR*  | 95% CI        | P     |
|            |                                                         | 4.21 | [0.99, 17.91] | 0.05  |
| Adjusted   | Adjusted variables                                      | HR*  | 95% CI        | P     |
|            | <b>Demographics</b>                                     |      |               |       |
|            | <i>Age</i>                                              | 2.45 | [1.02,5.9]    | 0.04  |
|            | <i>Race (AA)</i>                                        | 3.46 | [0.79,15.21]  | 0.1   |
|            | <i>Ethnicity</i>                                        | 2.66 | [0.58,12.14]  | 0.21  |
|            | <i>Obesity</i>                                          | 4.15 | [0.97,17.69]  | 0.05  |
|            | <b>Comorbidities</b>                                    |      |               |       |
|            | <i>CAD</i>                                              | 5.59 | [1.07,19.65]  | 0.04  |
|            | <i>DM</i>                                               | 3.75 | [0.87,16.11]  | 0.08  |
|            | <i>HTN</i>                                              | 4.12 | [0.97,17.56]  | 0.05  |
|            | <i>Stroke</i>                                           | 3.87 | [0.91,16.56]  | 0.07  |
|            | <i>HF</i>                                               | 4.21 | [0.99,17.91]  | 0.05  |
|            | <i>Cancer</i>                                           | 4.06 | [0.95,17.36]  | 0.05  |
|            | <b>Transplant Characteristics</b>                       |      |               |       |
|            | <i>CIT (/5 hour)</i>                                    | 4.19 | [0.98,17.87]  | 0.05  |
|            | <i>CMV High risk</i>                                    | 3.99 | [0.93,17.04]  | 0.06  |
|            | <i>DCD</i>                                              | 1.85 | [0.53,6.44]   | 0.33  |
|            | <i>Dialysis duration</i>                                | 4.24 | [1,18.06]     | 0.05  |
|            | <i>DGF</i>                                              | 3.68 | [0.89,16.24]  | 0.07  |
|            | <i>High PRA</i>                                         | 4.33 | [0.99,1796]   | 0.05  |
|            | <i>HLA</i>                                              | 3.95 | [0.93,16.84]  | 0.06  |
|            | <i>Simulect Induction</i>                               | 4.17 | [0.98,17.81]  | 0.05  |
|            | <i>OMM</i>                                              | 3.98 | [0.93,17]     | 0.05  |
|            | <b>Donor Characteristics</b>                            |      |               |       |
|            | <i>Age</i>                                              | 4.03 | [0.95,17.19]  | 0.06  |
|            | <i>Dm</i>                                               | 4.31 | [1,18.54]     | 0.049 |
|            | <i>Ethnicity</i>                                        | 4.17 | [0.98,17.74]  | 0.05  |
|            | <i>Gender</i>                                           | 4.19 | [0.98,17.86]  | 0.05  |

|  |                 |      |              |      |
|--|-----------------|------|--------------|------|
|  | <i>HTN</i>      | 4.53 | [1.06,19.45] | 0.04 |
|  | <i>Serum Cr</i> | 4.15 | [0.97,17.68] | 0.05 |

OMM, 0-human leukocyte antigen mismatch; AA, African American; CAD, coronary artery disease; CI, Confidence interval; CIT, cold ischemic time; CMV, cytomegalovirus; Cr, creatinine; DDKT, deceased donor kidney transplant; DGF, delayed graft function; DM, diabetes mellitus; HF, heart failure; HLA, human leukocyte antigen; HR, hazard ratio; HTN, hypertension; LDKT, living donor kidney transplant; PRA, panel reactive antibody; UI, undocumented immigrants; UR, US residents  
 \* UI is a reference

eTable 7. Rejection for All Transplant

|            | Hazards ratio (US resident vs. Undocumented Immigrants) |      |             |      |
|------------|---------------------------------------------------------|------|-------------|------|
| Unadjusted | Unadjusted                                              | HR*  | 95% CI      | P    |
|            |                                                         | 1.44 | [0.69,2.99] | 0.33 |
| Adjusted   | Adjusted variables                                      | HR*  | 95% CI      | P    |
|            | <b>Demographics</b>                                     |      |             |      |
|            | <i>Age</i>                                              | 1.67 | [0.79,3.53] | 0.18 |
|            | <i>Race (AA)</i>                                        | 1.73 | [0.81,3.71] | 0.16 |
|            | <i>Ethnicity</i>                                        | 1.85 | [0.87,3.91] | 0.11 |
|            | <i>Obesity</i>                                          | 1.42 | [0.68,2.95] | 0.35 |
|            | <b>Comorbidities</b>                                    |      |             |      |
|            | <i>CAD</i>                                              | 1.44 | [0.69,2.99] | 0.33 |
|            | <i>DM</i>                                               | 1.45 | [0.69,3.03] | 0.33 |
|            | <i>HTN</i>                                              | 1.48 | [0.71,3.07] | 0.30 |
|            | <i>Stroke</i>                                           | 1.43 | [0.69,2.99] | 0.34 |
|            | <i>HF</i>                                               | 1.46 | [0.7, 3.04] | 0.31 |
|            | <i>Cancer</i>                                           | 1.40 | [0.69,2.91] | 0.38 |
|            | <b>Transplant Characteristics</b>                       |      |             |      |
|            | <i>CIT (/5 hour)</i>                                    | 1.47 | [0.71,3.06] | 0.3  |
|            | <i>CMV High risk</i>                                    | 1.42 | [0.68,2.97] | 0.35 |
|            | <i>Dialysis duration</i>                                | 1.44 | [0.69,2.99] | 0.33 |
|            | <i>DGF</i>                                              | 1.34 | [0.64,2.79] | 0.44 |
|            | <i>High PRA</i>                                         | 1.43 | [0.69,2.98] | 0.34 |
|            | <i>HLA</i>                                              | 1.50 | [0.72,3.13] | 0.28 |
|            | <i>Living Donor</i>                                     | 1.44 | [0.69,3]    | 0.33 |
|            | <i>Simulect Induction</i>                               | 1.46 | [0.7,3.03]  | 0.32 |
|            | <i>OMM</i>                                              | 1.46 | [0.7,3.05]  | 0.32 |
|            | <b>Donor Characteristics</b>                            |      |             |      |
|            | <i>Age</i>                                              | 1.43 | [0.69,2.98] | 0.34 |
|            | <i>Dm</i>                                               | 1.51 | [0.72,3.16] | 0.29 |
|            | <i>Ethnicity</i>                                        | 1.58 | [0.75,3.32] | 0.23 |

|  |                 |      |             |      |
|--|-----------------|------|-------------|------|
|  | <i>Gender</i>   | 1.39 | [0.67,2.89] | 0.38 |
|  | <i>HTN</i>      | 1.48 | [0.71,3.1]  | 0.30 |
|  | <i>Serum Cr</i> | 1.48 | [0.71,3.08] | 0.29 |

OMM, 0-human leukocyte antigen mismatch; AA, African American; CAD, coronary artery disease; CI, Confidence interval; CIT, cold ischemic time; CMV, cytomegalovirus; Cr, creatinine; DDKT, deceased donor kidney transplant; DGF, delayed graft function; DM, diabetes mellitus; HF, heart failure; HLA, human leukocyte antigen; HR, hazard ratio; HTN, hypertension; LDKT, living donor kidney transplant; PRA, panel reactive antibody; UI, undocumented immigrants; UR, US residents

\* UI is a reference

eTable 8. Rejection for DDRT Only

|            | Hazards ratio (US resident vs. Undocumented Immigrants) |      |             |      |
|------------|---------------------------------------------------------|------|-------------|------|
| Unadjusted | Unadjusted                                              | HR*  | 95% CI      | P    |
|            |                                                         | 1.06 | [0.47,2.37] | 0.90 |
| Adjusted   | Adjusted variables                                      | HR*  | 95% CI      | P    |
|            | <b>Demographics</b>                                     |      |             |      |
|            | <i>Age</i>                                              | 1.22 | [0.53,2.77] | 0.64 |
|            | <i>Race (AA)</i>                                        | 1.14 | [0.49,2.66] | 0.77 |
|            | <i>Ethnicity</i>                                        | 1.23 | [0.54,2.82] | 0.62 |
|            | <i>Obesity</i>                                          | 1.05 | [0.47,2.36] | 0.91 |
|            | <b>Comorbidities</b>                                    |      |             |      |
|            | <i>CAD</i>                                              | 1.05 | [0.47,2.36] | 0.91 |
|            | <i>DM</i>                                               | 1.05 | [0.47,2.39] | 0.9  |
|            | <i>HTN</i>                                              | 1.09 | [0.49,2.46] | 0.83 |
|            | <i>Stroke</i>                                           | 1.06 | [0.47,2.38] | 0.9  |
|            | <i>HF</i>                                               | 1.06 | [0.47,2.38] | 0.89 |
|            | <i>Cancer</i>                                           | 1.06 | [0.47,2.4]  | 0.88 |
|            | <b>Transplant Characteristics</b>                       |      |             |      |
|            | CIT (/5 hour)                                           | 1.11 | [0.49,2.5]  | 0.81 |
|            | CMV High risk                                           | 1.04 | [0.46,2.34] | 0.93 |
|            | DCD                                                     | 1.02 | [0.45,2.3]  | 0.97 |
|            | Dialysis duration                                       | 1.06 | [0.47,2.38] | 0.9  |
|            | DGF                                                     | 0.89 | [0.39,2.03] | 0.78 |
|            | High PRA                                                | 1.05 | [0.47,2.36] | 0.9  |
|            | HLA                                                     | 1.15 | [0.51,2.61] | 0.73 |
|            | <i>Simulect Induction</i>                               | 1.09 | [0.48,2.47] | 0.83 |
|            | <i>OMM</i>                                              | 1.07 | [0.47,2.42] | 0.88 |
|            | <b>Donor Characteristics</b>                            |      |             |      |
|            | <i>Age</i>                                              | 1.05 | [0.47,2.37] | 0.9  |



|  |                  |      |             |      |
|--|------------------|------|-------------|------|
|  | <i>Dm</i>        | 1.11 | [0.49,2.54] | 0.8  |
|  | <i>Ethnicity</i> | 1.05 | [0.47,2.37] | 0.9  |
|  | <i>Gender</i>    | 1.06 | [0.47,2.39] | 0.89 |
|  | <i>HTN</i>       | 1.09 | [0.48,2.47] | 0.83 |
|  | <i>Serum Cr</i>  | 1.11 | [0.49,2.5]  | 0.8  |

OMM, 0-human leukocyte antigen mismatch; AA, African American; CAD, coronary artery disease; CI, Confidence interval; CIT, cold ischemic time; CMV, cytomegalovirus; Cr, creatinine; DDKT, deceased donor kidney transplant; DGF, delayed graft function; DM, diabetes mellitus; HF, heart failure; HLA, human leukocyte antigen; HR, hazard ratio; HTN, hypertension; LDKT, living donor kidney transplant; PRA, panel reactive antibody; UI, undocumented immigrants; UR, US residents  
 \* UI is a reference

A)

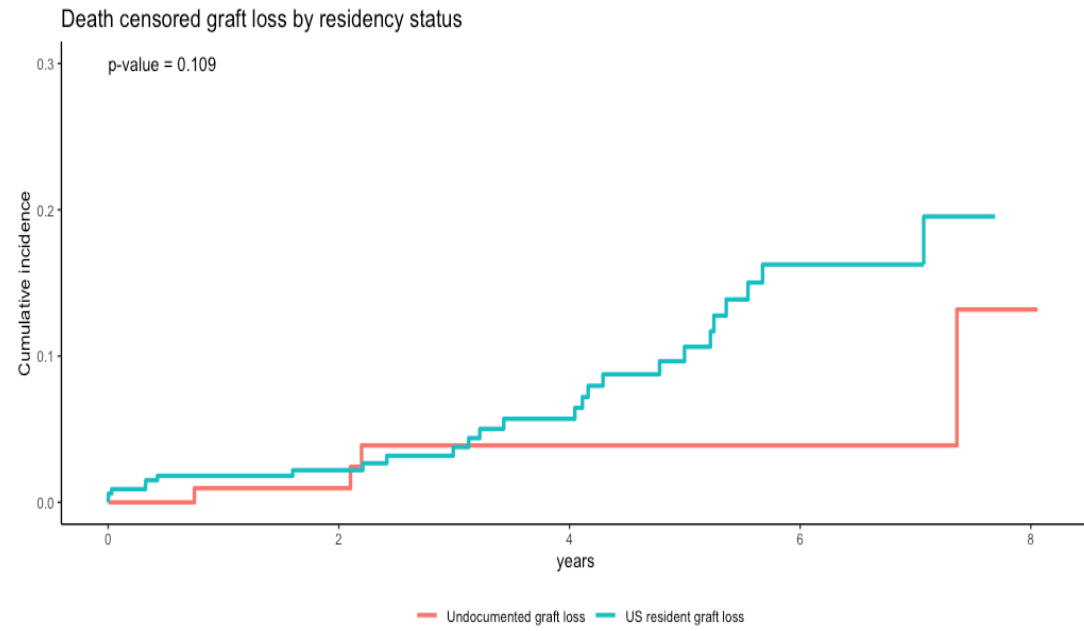

B)

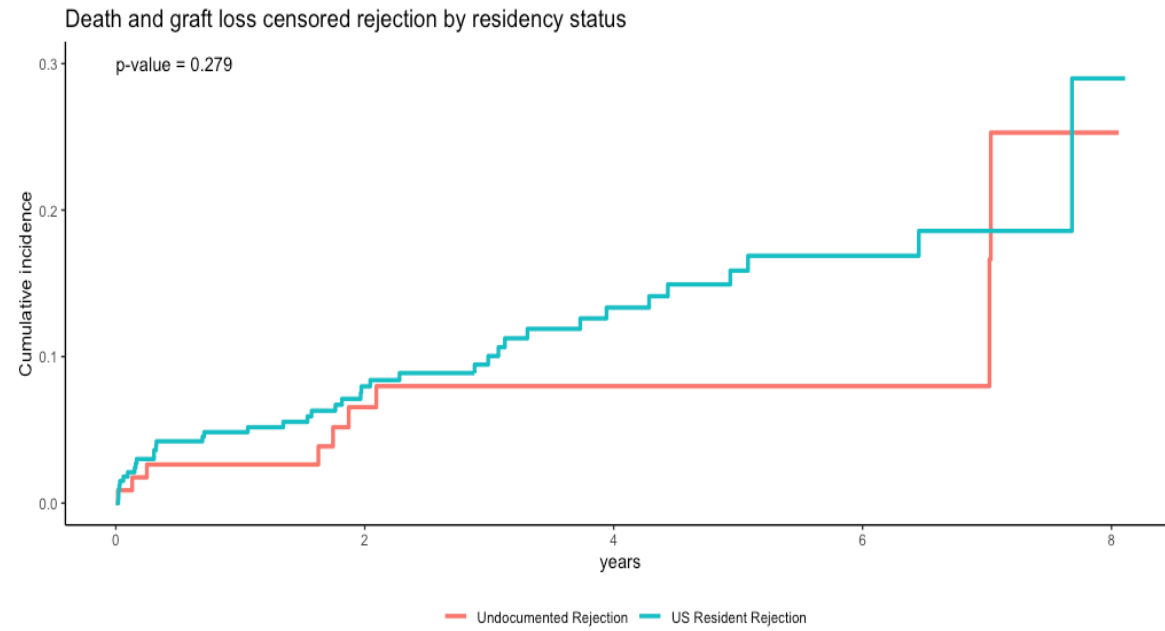

eFigure 1. Cumulative Incidence Curve for A) Death Censored Graft Loss B) Death and Graft Loss Censored Rejection by Residency Status

eFigure 2. Conceptual Framework

## Conceptual Framework

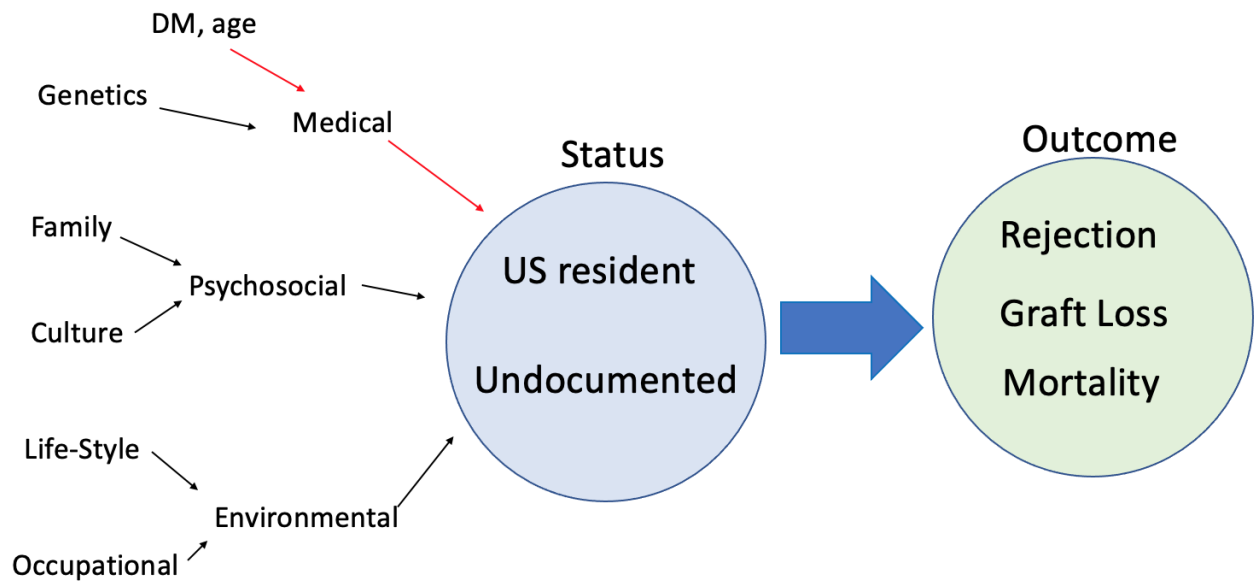

Supplement: jamanetwopen-e2254660-s001.pdf [file jamanetwopen-e2254660-s001.pdf]
