# Supplementary material for: Outcomes Among Undocumented Immigrant Kidney Transplant Recipients in California
Source: PubMed Central journal article supplement (PMC9926318; doi:10.1001/jamanetworkopen.2022.54660), 2023-02-13
Supplement: jamanetwopen-e2254660-s002.pdf [file jamanetwopen-e2254660-s002.pdf]

## Data Sharing Statement

Eguchi. Outcomes Among Undocumented Immigrant Kidney Transplant Recipients in California. *JAMA Netw Open*. Published February 13, 2023.

doi:10.1001/jamanetworkopen.2022.54660

### Data

**Data available:** Yes

**Data types:** Deidentified participant data

**How to access data:** Hirohito Ichii [hichii@uci.edu](mailto:hichii@uci.edu)

**When available:** With publication

### Supporting Documents

**Document types:** None

### Additional Information

**Who can access the data:** researchers whose proposed use of the data has been approved

**Types of analyses:** for any purpose

**Mechanisms of data availability:** after approval of a proposal
